# Supplementary material for: Artemisinin Derivatives Stimulate DR5-Specific TRAIL-Induced Apoptosis by Regulating Wildtype P53
Source: PubMed Central journal article supplement (PMC7563660; doi:10.3390/cancers12092514), 2020-09-04
Supplement: cancers-12-02514-s001.pdf [file cancers-12-02514-s001.pdf]

# Artemisinin Derivatives Stimulate DR5-Specific TRAIL-Induced Apoptosis by Regulating Wild Type P53

Xinyu Zhou, Sietske N. Zijlstra, Abel Soto-Gamez, Rita Setroikromo and Wim J. Quax

**Table S1.** List of primers used for qRT-PCR.

| Name      | Strand | Sequence                           |
|-----------|--------|------------------------------------|
| GAPDH     | F      | 5'-ACCCAGAAGACTGTG-3'              |
|           | R      | 5'-TCTAGACGGCAGGTC-3'              |
| DR4       | F      | 5'-CAGAACGTCCTGGAGCCTGTAAC-3'      |
|           | R      | 5'-ATGTCCATTGCCTGATTCTTTGTG-3'     |
| DR5       | F      | 5'-TGCAGCCGTAGTCTTGATTG-3'         |
|           | R      | 5'-GCACCAAGTCTGCAAAGTCA-3'         |
| DcR1      | F      | 5'-CACCAACGCTTCCAACAATGAACC-3'     |
|           | R      | 5'-TCCGGAAGGTGCCTTCTTTACACT-3'     |
| DcR2      | F      | 5'-CTTTTCCGGCGGCGTTCATGTCCTTC-3'   |
|           | R      | 5'-GTTTCTTCCAGGCTGCTTCCCTTTGTAG-3' |
| P53       | F      | 5'-GCCCCCCTCAGCATCTTAT-3'          |
|           | R      | 5'-AAAGCTGTTCCGTCCAGTA-3'          |
| P21       | F      | 5'-CTGGGGATGTCCGTCAGAAC-3'         |
|           | R      | 5'-CATTAGCGCATCACAGTCGC-3'         |
| PUMA      | F      | 5'-CTCGGTGCTCCTTCACTCTG-3'         |
|           | R      | 5'-AGGCTAGTGGTCACGTTTGG-3'         |
| Caspase 9 | F      | 5'-AAAGTTGTGCGAAGCCAACCC-3'        |
|           | R      | 5'-GACTCACGGCAGAAGTTCAC-3'         |
| MDM2      | F      | 5'-CAGCAGGAATCATCGGACTCA-3'        |
|           | R      | 5'-AGGTCCTTTTGATCACTCCCAC-3'       |
| BAX       | F      | 5'-AACATGGAGCTGCAGAGGAT-3'         |
|           | R      | 5'-CCAATGTCCAGCCCATGATG-3'         |
| BCL-2     | F      | 5'-TTCTTTGAGTTCGGTGGGGT-3'         |
|           | R      | 5'-CTTCAGAGACAGCCAGGAGA-3'         |
| Caspase 6 | F      | 5'-ATGGCGAAGGCAAATCACATTT-3'       |
|           | R      | 5'-GTGCTGGTTTCCCCGACAT-3'          |

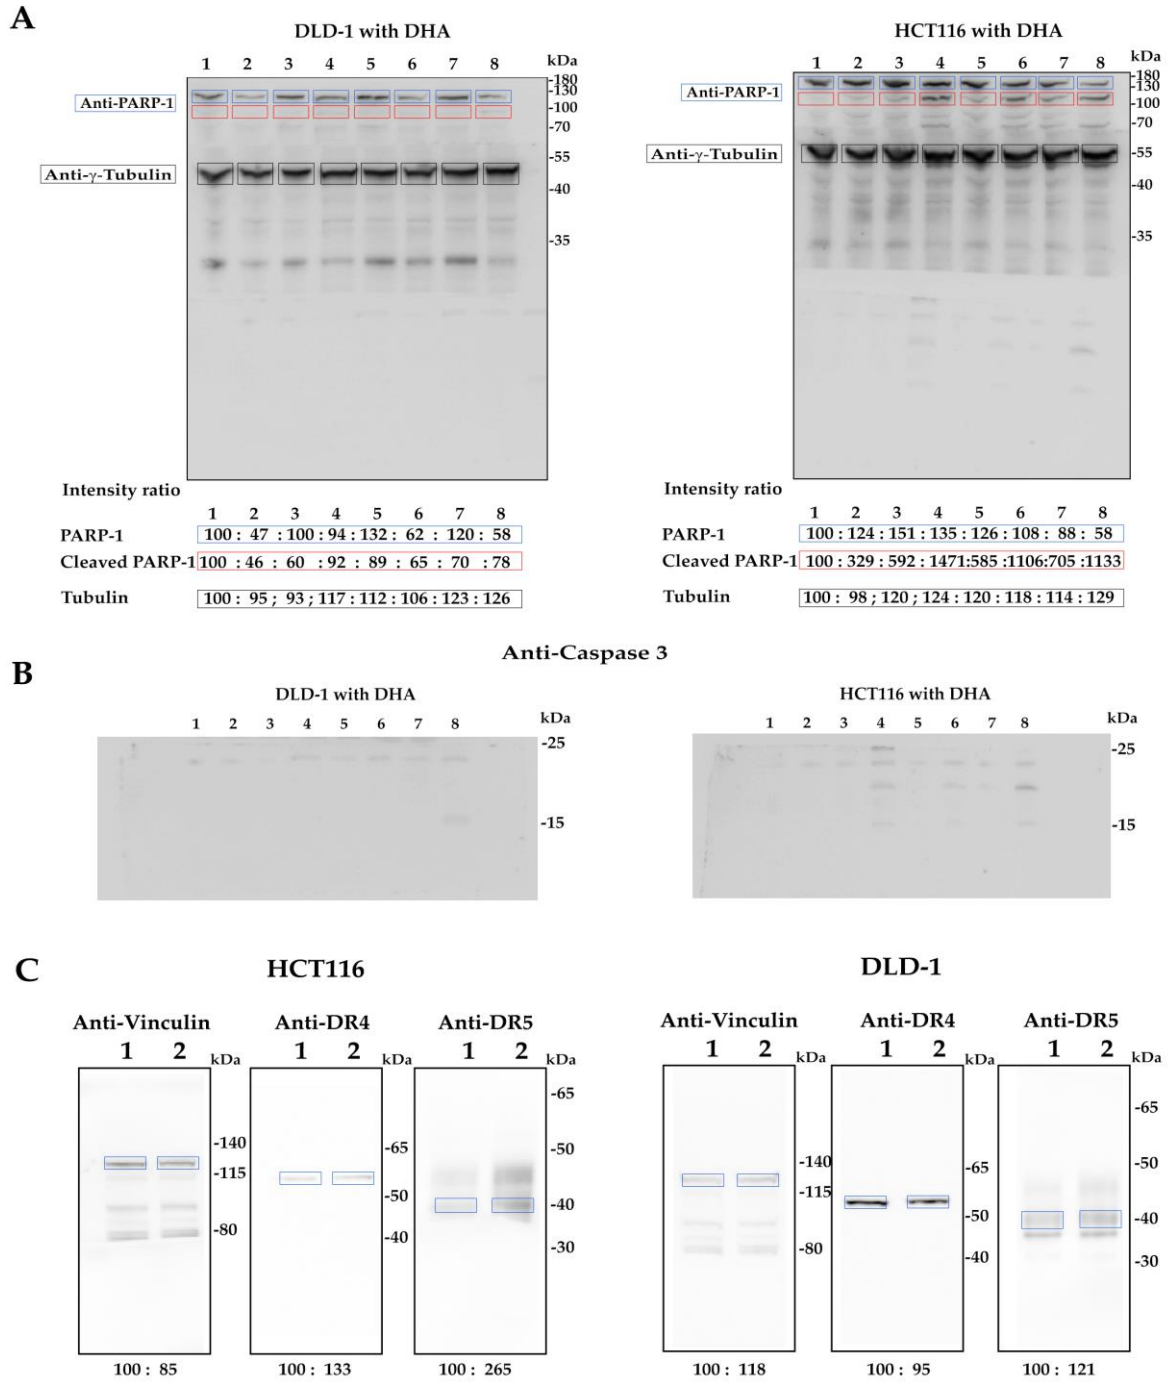

**Figure S1.** The whole blot showing all the bands with molecular weight markers on the Western as the supplementary for Figure 4 and 6. (A) and (B) for Figure 4C; (C) for Figure 6C.

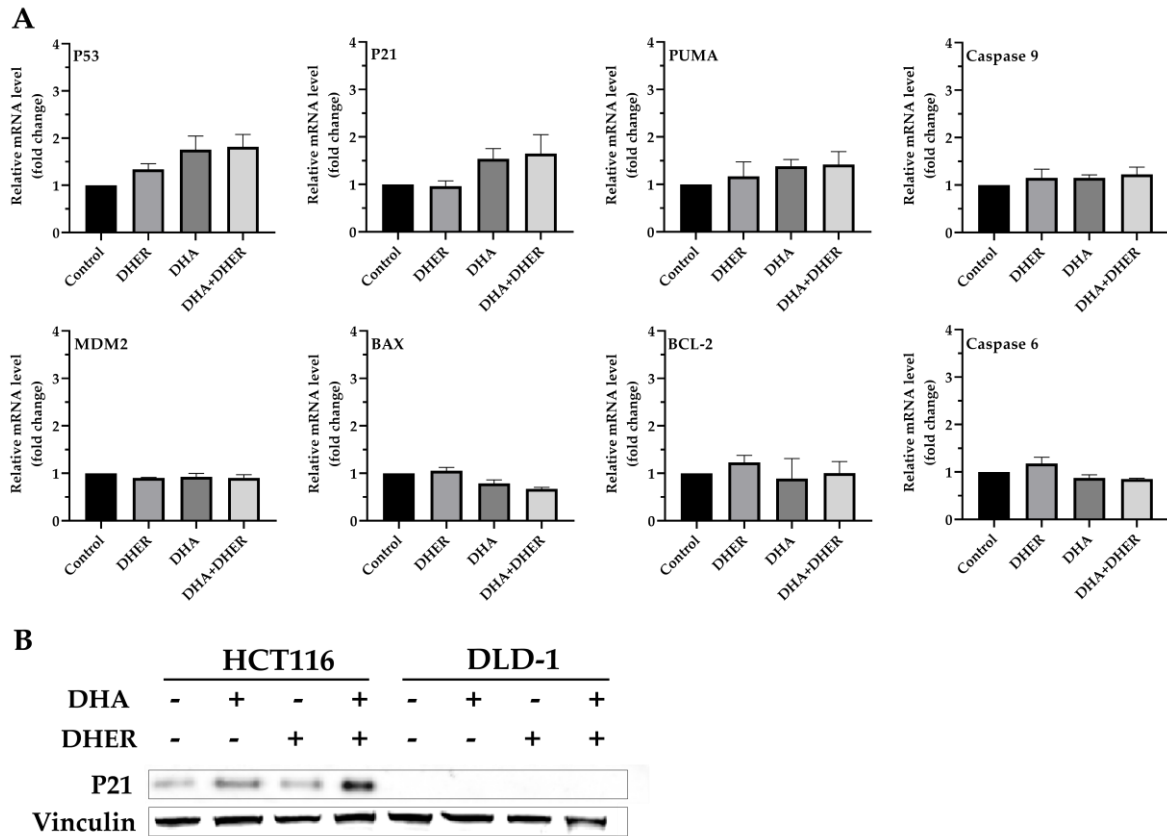

**Figure S2.** The influence of DHA on p53 pathway in DLD-1. (A) Relative mRNA levels of P53, P21, PUMA, Caspase 9, MDM2, BAX, BCL-2, Caspase 6 in DLD-1. (B) The western blot of P21 in HCT116 and DLD-1 using Vinculin as the loading control. The cells were treated with 10  $\mu$ M DHA for 30 min followed with/without 5 ng/ml DHER for 24 h. Relative gene expression (normalized to GAPDH) was analyzed by qRT-PCR and transduced with control. Data shown are mean  $\pm$  SEM from three independent experiments performed in triplicate. p values were compared with control cells in each group and analyzed by two-way ANOVA with Dunnett multiple comparisons test in Graphpad Prism version 8.0.

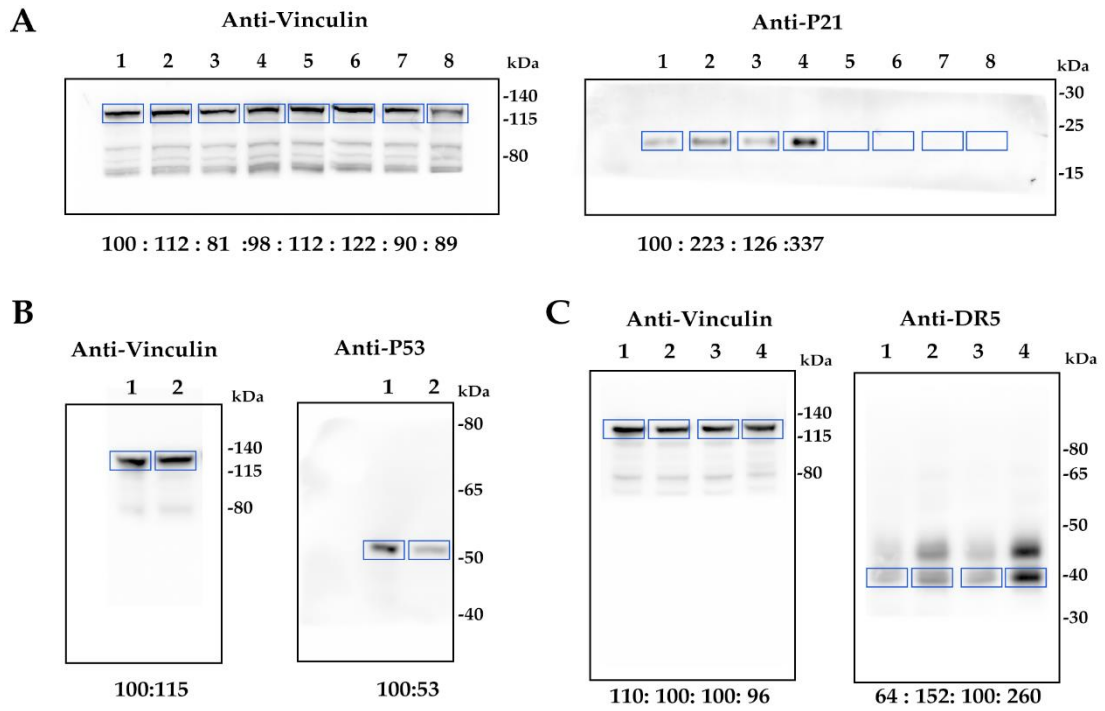

**Figure S3.** The whole blot showing all the bands with molecular weight markers on the Western as the supplementary for Figure 7. (A) for Figure 7B; (B) for Figure 7C; (C) for Figure 7E

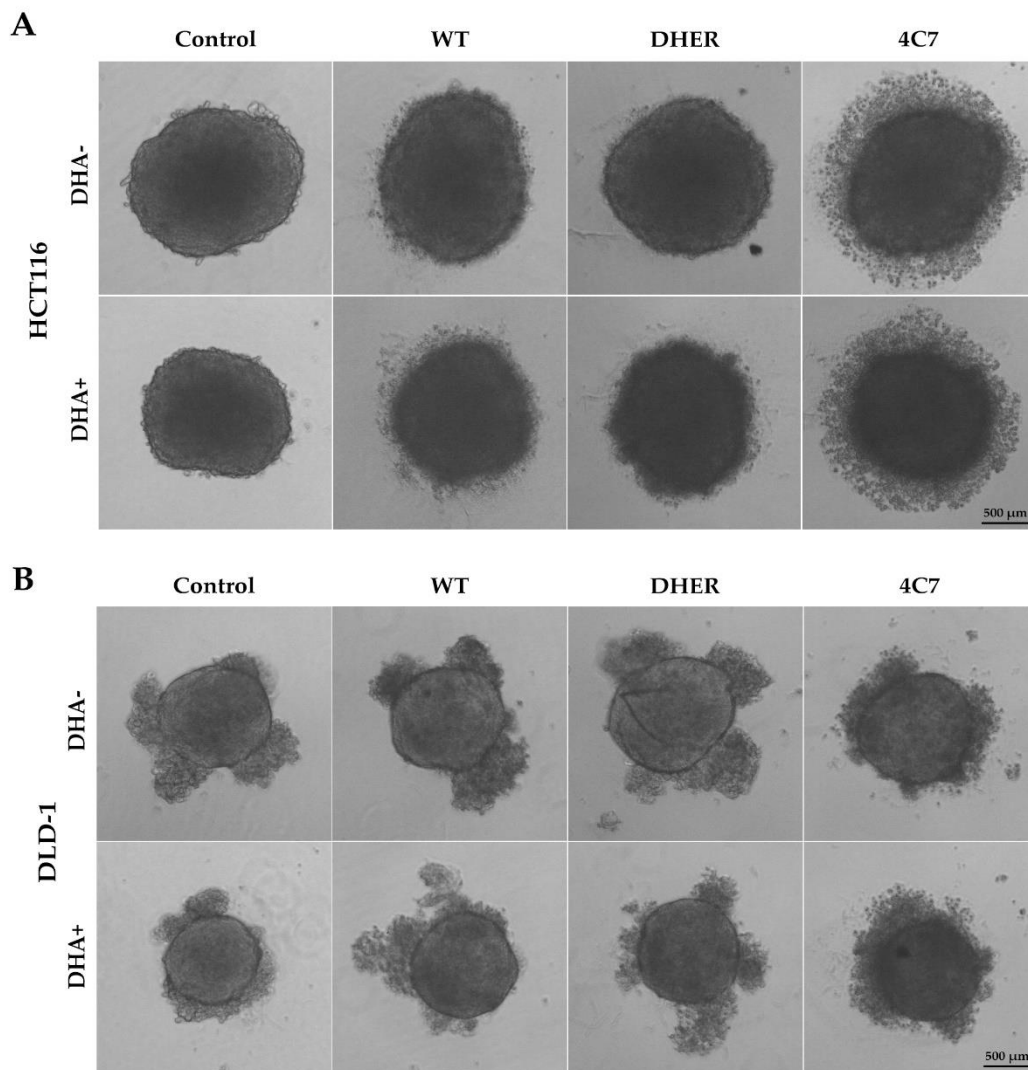

**Figure S4.** The 3D spheroids morphology changes under DHA treatment in HCT116 (A) and DLD-1 (B). The 3D spheroids of HCT116 and DLD-1 were constructed in ultra-low attachment 96-well plates after 72 h incubation. Then the spheroids were treated with 10  $\mu$ M DHA for 30 min followed with/without 25 ng/ml rhTRAIL WT, DHER or 4C7 for 24 h. Morphology changes were observed under an inverted light microscope with 40 $\times$  magnification.

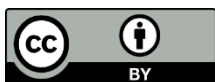

© 2020 by the authors. Submitted for possible open access publication under the terms and conditions of the Creative Commons Attribution (CC BY) license (<http://creativecommons.org/licenses/by/4.0/>).
